# Supplementary material for: Enzyme encapsulation in nanoporous silica spheresElectronic supplementary information (ESI) available: experimental details, and details of particle characterization. See http://www.rsc.org/suppdata/cc/b4/b403871a/
Source: Royal Society of Chemistry journal article supplement (doi:10.1039/b403871a), 2004-01-01
Supplement: b403871a.doc [file b403871a.doc]

**Supplementary Information**

# Enzyme encapsulation in nanoporous silica spheres

Yajun Wang and Frank Caruso*

Centre for Nanoscience and Nanotechnology, Department of Chemical and Biomolecular Engineering, The University of Melbourne, Victoria 3010, Australia, Fax: +61 3 8344 4153, E-mail: fcaruso@unimelb.edu.au.

***Materials***: Poly(diallyldimethylammonium chloride (PDDA, Mw 100 000 ~ 200 000), poly(allylamine hydrochloride) (PAH, Mw 15 000), and poly(sodium 4-styrenesulfonate (PSS, Mw 70 000) were obtained from Sigma-Aldrich. All polyelectrolyte solutions were of concentration 1 mg mL-1 and contained 0.5 M NaCl. Catalase (Bovine liver, Sigma C-100, 42 300 units mg-1 protein), protease (Streptomyces griseus, Sigma P6911, 5.2 units mg-1 solid), peroxidase-fluorescein isothiocyanate labelled (FITC-POD, Sigma P2649, extent of labeling 1-2 mol FITC per mol peroxidase), and cytochrome C (Cyt. C, Bovine heart, Sigma C-2037) were dissolved in 50 mM phosphate buffered saline (PBS) with a protein concentration of *ca.* 0.4 mg mL-1. Cetyltrimethylammonium bromide (CTABr), sodium metasilicate (Na2SiO3), tetraethyl orthosilicate (TEOS, 98%), *n*-dodecylamine (98%), ammonia solution (25 wt% in water), and *iso*-propanol were used as received from Aldrich. The colloidal silica (Ludox AM-30, 30 wt% suspension in water) was provided by DuPont. The water used in all experiments was prepared in a Millipore Milli-Q purification system and had a resistivity higher than 18.2 MΩ cm.

***Preparation of bimodal mesoporous silica (BMS) spheres***: Following ref. 11(G. Schulz-Ekloff, J. Rathouský, A. Zukal, *Int. J. Inorg. Mater*., 1999, **1**, 97), 5.04 g of CTABr and 2.57 g of Na2SiO3 were dissolved in 90 mL of deionized water in a polyethylene bottle at room temperature. The mixture was stirred until it formed a clear solution, after which 6.4 mL of ethyl acetate was added, the mixture stirred for 30 s and then allowed to stand at 30 oC for 5 h. After this period of ageing, the polyethylene bottle (with a hole in the cap to allow evaporation of the organic vapor during heating) was kept at 90 oC for 2 days in an oil bath. To obtain particles with a relatively narrow size distribution, larger particles (> 4 µm) in the product were removed through multi-step gravity sedimention/redispersion steps. The product (particles of diameter ca. 2–4 µm) was collected by centrifugation (200*g*), and washed with ethanol three times and then twice with water. The surfactant in the BMS particles was extracted in a refluxed HCl/ethanol (1 HCl (35 wt%):10 ethanol (v/v)) solution. 5 g of the as-synthesized material was added to 250 mL of the extraction solution, which was kept refluxing for 12 h and then filtered. The extraction step was repeated twice. Finally, the sample was washed with 200 mL of ethanol and dried at 90 oC for 24 h. Nitrogen sorption isotherms, and pore distributions of the particles are shown in Fig. S1. The BMS spheres have a surface area of 632 m2 g-1, and a pore volume of 1.72 mL g-1. The smaller mesopores in the BMS spheres have pore sizes of 2-3 nm, and the larger mesopores are between 10 - 40 nm with pore volume of *ca.* 1.28 mL g-1. The CTABr/Na2SiO3 molar ratio used to prepare the BMS material is much higher (*ca.* two times) than that used to prepare conventional mesoporous materials. It can be expected that the as-synthesized BMS particles contain domains with stable silica walls between the micelles as well as domains in which these walls are unstable or even missing, which will form the larger mesopores after the removal of surfactant micelles (G. Schulz-Ekloff, J. Rathouský, A. Zukal, *Int. J. Inorg. Mater*., 1999, **1**, 97).

***Preparation of mesoporous silica (MS) spheres***: The MS spheres (*ca.* 1.8 µm diameter) were prepared using a neutral amine template in a homogeneous phase provided by a water/ethanol cosolvent system (R. I. Nooney, D. Thirunavukkarasu, Y. Chen, R. Josephs, A. E. Ostafin, *Chem. Mater.*, 2002, **14**, 4721). Typically, 63 g of ethanol and 0.58 g of *n*-dodecylamine were added to 80 mL of deionized water with rapid stirring and sonication for 5 min to form a clear solution. 1.0 mL of ammonium hydroxide solution (2.0 M NH3·H2O in *iso*-propanol) was then added to the above solution and after 10 min, 2.32 g of TEOS was added with vigorous stirring for another 10 min. The products were collected through filtration, after having allowed the suspension to stand at ambient temperature for 24 h. The surfactant was removed by calcining the sample at 550 oC for 6 h. The MS spheres have a surface area of 1087 m2 g-1, a pore volume of 0.79 mL g-1, and an average pore size of *ca.* 2 nm. (See the nitrogen sorption isotherms in Fig. S1.)

***Enzyme loading and encapsulation:*** Approximately 10 mg of the particles were incubated with 10 mL of catalase stock solution under stirring at room temperature for 48 h. The enzyme retained by the particles was monitored by UV-vis spectroscopy, i.e., by monitoring the difference at 405 nm between the protein absorbance in solution before and after adsorption, and after separating the supernatants *via* centrifugation at a speed of 500*g* for 5 min. Loading experiments for the other enzymes were carried out using this procedure, with the exception that the band monitored to measure the absorbance was different (cytochrome C at 530 nm, protease at 280 nm).

The enzyme-loaded particles were then washed with chilled (5 °C) PBS buffer twice. Adsorption of PDDA and the silica nanoparticles was performed at 5 °C for 10 min, with occasional shaking, and excess polymer and nanoparticles were separated by three centrifugation/redispersion cycles using chilled 0.1 M NaCl solutions. The silica nanoparticles have a diameter of *ca.* 21 nm (measured by TEM and DLS), and were used at a concentration of 0.5 wt% (containing 0.1 M NaCl). For the adsorption, typically 0.5 mL of PDDA solution (1 mg mL-1 in 0.5 M NaCl) or colloidal silica (0.5 wt% in 0.1 M NaCl) was added to *ca.* 10 mg of the enzyme-loaded particles. Following each adsorption step, the sample was centrifuged at 500*g* for 3 min, and the centrifugation/washing cycle was repeated a further two times. Some samples were subsequently coated by four additional layer pairs of PAH/PSS using the same method described above. The particles containing encapsulated enzyme were finally dispersed in a PBS solution with a concentration of *ca.* 10 mg mL-1.

***Instruments:*** N2 adsorption–desorption measurements were conducted on a Micromeritics ASAP 2000 apparatus at 77 K using nitrogen as the adsorption gas. The surface areas were calculated by the BET method and the pore diameter distribution curves were derived from the adsorption branch by the BJH method. The particle morphologies were examined by scanning electron microscopy (SEM, Philips XL30, operated at 20 kV) and transmission electron microscopy (TEM, Philips CM120 BioTWIN, operated at 120 kV). SEM samples were prepared by dropping a diluted particle suspension (dispersed in ethanol) onto a stub and allowing it to dry at room temperature for 10 min, and then sputter coating with gold. TEM samples were prepared by dropping a diluted particle suspension (dispersed in water) onto a copper grid and allowing it to dry at ambient temperature. The silica nanoparticle size was measured on a Zetasizer 2000 (Malvern) instrument. Confocal micrographs were taken with an Olympus confocal system equipped with a 60 oil immersion objective. A UV-vis (Agilent 8453) spectrophotometer was used to monitor the enzyme loading and for the activity assays.

**Fig. S1.** Nitrogen sorption isotherms of the MS spheres (a) and BMS spheres (b). The inset is a pore distribution curve of the BMS particles analyzed from the adsorption branch using the BJH method, showing the bimodal mesoporous structure of the BMS particles.
